# Supplementary material for: Meningoencephalitis with malacia caused by Sarcocystis calchasi in a rock pigeon in Japan
Source: PubMed Central journal article supplement — J Vet Med Sci. 2024 Jun 27;86(8):906–10. doi: 10.1292/jvms.24-0069 (PMC11300125; doi:10.1292/jvms.24-0069), 2024-06-27
Supplement: jvms-86-906-s001.pdf [file jvms-86-906-s001.pdf]

# Supplementary data

## **Meningoencephalitis with malacia caused by *Sarcocystis calchasi* in a rock pigeon in Japan**

Mio Kobayashi<sup>1,2</sup>, Keisuke Takesue<sup>1</sup>, Tetsuhito Kigata<sup>3</sup>, Natsumi Kobayashi<sup>4</sup>, Susumu Iwaide<sup>2,4</sup>, Tomoaki Murakami<sup>4</sup>, Hayato Harima<sup>5</sup>, Akiko Yamazaki<sup>6</sup>, Daigo Azakami<sup>7, 8</sup>, Makoto Shibutani<sup>1</sup>, Toshinori Yoshida<sup>1</sup>

1. Laboratory of Veterinary Pathology, Cooperative Department of Veterinary Medicine, Tokyo University of Agriculture and Technology, 3-5-8 Saiwai-cho, Fuchu-shi, Tokyo 183-8509, Japan

2. Cooperative Division of Veterinary Sciences, Tokyo University of Agriculture and Technology, 3-5-8 Saiwai-cho, Fuchu-shi, Tokyo 183-8509, Japan

3. Laboratory of Veterinary Anatomy, Cooperative Department of Veterinary Medicine, Tokyo University of Agriculture and Technology, 3-5-8 Saiwai-cho, Fuchu-shi, Tokyo 183-8509, Japan

4. Laboratory of Veterinary Toxicology, Cooperative Department of Veterinary Medicine, Tokyo University of Agriculture and Technology, 3-5-8 Saiwai-cho, Fuchu-shi, Tokyo 183-8509, Japan

5. Laboratory of Veterinary Public Health, Cooperative Department of Veterinary Medicine, Tokyo University of Agriculture and Technology, 3-5-8 Saiwai-cho, Fuchu-shi, Tokyo 183-8509, Japan

6. Cooperative Department of Veterinary Medicine, Iwate University, 3-18-8 Ueda, Morioka 020-8550, Japan

7 Animal Medical Center, Tokyo University of Agriculture and Technology, 3-5-8 Saiwai-cho, Fuchu, Tokyo, 183-8509, Japan

8 Laboratory of Veterinary Clinical Oncology, Tokyo University of Agriculture and Technology, 3-5-8 Saiwai-cho, Fuchu, Tokyo, 183-8509, Japan

Corresponding author: Toshinori Yoshida, DVM, PhD

Laboratory of Veterinary Pathology, Cooperative Department of Veterinary Medicine, Tokyo University of Agriculture and Technology, 3-5-8 Saiwai-cho, Fuchu-shi, Tokyo 183-8509, Japan

E-mail: yoshida7@cc.tuat.ac.jp\_Tel: +81-42-367-5874 Fax: +81-42-367-5771

Supplementary Table 1. Antibody used in immunohistochemistry

| Antigen                                           | Host species | Clonality  | Clone name | Dilution | Antigen retrieval        | Manufacture                          |
|---------------------------------------------------|--------------|------------|------------|----------|--------------------------|--------------------------------------|
| Glial fibrillary acidic protein (GFAP)            | Mouse        | monoclonal | GA5        | 1:800    | Microwaving <sup>a</sup> | Merck KGaA (Darmstadt, DE)           |
| Cluster of differentiation 3 (CD3)                | Rabbit       | polyclonal | n.a.       | 1:100    | Microwaving <sup>a</sup> | Abcam (Cambridge, UK)                |
| Paired Box 5 (PAX5)                               | Mouse        | monoclonal | 24/PAX5    | 1:100    | Autoclaving <sup>b</sup> | BD Biosciences (Franklin Lakes, USA) |
| Ionized calcium-binding adapter molecule 1 (Iba1) | Rabbit       | polyclonal | n.a.       | 1:300    | Autoclaving <sup>b</sup> | Wako (Osaka, JP)                     |

Abbreviation: n.a, not applicable.

a: Microwaved at 90°C for 10 min in Dako target retrieval solution (pH 9.0).

b: Autoclaved at 121°C for 10 min in 10 mM citrate buffer (pH 6.0).

Supplementary Table 2. PCR primers for PCR

| ID           | Direction | Sequence (5'-3')          | Amplicon size (bp) | Target site | References |
|--------------|-----------|---------------------------|--------------------|-------------|------------|
| <i>SAD2</i>  | Forward   | GGAAGCGATTGGAACC          | 350                | 28S rRNA    | 18         |
| <i>SAD2</i>  | Reverse   | CCTTGGTCCGTGTTTCA         |                    | 28S rRNA    | 18         |
| <i>Sca1</i>  | Forward   | CTCCTTGCTCGAGAATGAACATGAG | 276–300            | ITS-1       | 11         |
| <i>Sca2</i>  | Reverse   | GATCATCTTTTCGACGACAATATCG | 474-498            | ITS-1       | 11         |
| <i>SNCa3</i> | Reverse   | TCCAGAGAAGATCCCCTGGCTAC   | 389-498            | ITS-1       | 11         |

Supplementary Table 3. Selected reports on *Sarcocystis* spp.-infected neuronal diseases in pigeons.

| Species                      | Intermediates host and countries                                                                                                               | Signs                                                                          | Lesions                                                                                                                           | Cites                                | IHC                      | Reference No. |
|------------------------------|------------------------------------------------------------------------------------------------------------------------------------------------|--------------------------------------------------------------------------------|-----------------------------------------------------------------------------------------------------------------------------------|--------------------------------------|--------------------------|---------------|
| <i>Sarcocystis</i> spp.      | Forty seven racing pigeons, Berlin, Germany                                                                                                    | Depression, mild diarrhea, torticollis, opisthotonus, paralysis, and trembling | Granulomatous and necrotizing encephalitis (cuffing, gliosis) and malacia (brain stem and cerebellum)                             | Cerebrum, brain stem, and cerebellum | none                     | 7             |
| <i>Sarcocystis calchasi</i>  | Five domestic pigeons*                                                                                                                         | Neurological disease                                                           | Multifocal lymphohistiocytic and necrotizing encephalitis (cuffing, gliosis, mononuclear cell infiltration)                       | Brain (including cerebrum)           | CD3, PAX5, Iba-1, MHC II | 12            |
| <i>Sarcocystis calchasi</i>  | One rock pigeon, Akihabara, Tokyo, Japan                                                                                                       | Emaciation, diarrhea, torticollis, and ataxia                                  | Multifocal inflammation (infiltration of mononuclear cells, cuffing, and meningitis)                                              | Cerebrum and brain stem              | CD3, PAX5, Iba-1         | 15            |
| <i>Sarcocystis calchasi</i>  | One White-winged Doves ( <i>Zenaida asiatica</i> ) and two Eurasian Collared Doves ( <i>Streptopelia decaocto</i> ), East-central Texas, USA   | Neurologic signs                                                               | Severe, multifocal histiocytic and lymphoplasmacytic meningoencephalitis (gliosis, cuffing, meningitis, and plasmacyte/mott cell) | Cerebrum and brain stem              | none                     | 3             |
| <i>Sarcocystis falcatula</i> | One free-ranging great horned owl ( <i>Bubo virginianus</i> ), Minnesota, USA                                                                  | Unable to fly and severe head tilt to the left                                 | Granulomatous meningoencephalitis (fibrinoid vascular necrosis, activated astrocyte) and malacia                                  | Cerebrum, brain stem, and cerebellum | none                     | 16            |
| <i>Sarcocystis falcatula</i> | Three bald eagles ( <i>Haliaeetus leucocephalus</i> ) and one golden eagle ( <i>Aquila chrysaetos</i> ), Virginia, Indiana, and Minnesota, USA | Tremor, hock sitting, ventroflexion of the neck, weakness, and lethargy        | Spongiform and multifocal glial nodules, gliosis, cuffing, and meningitis                                                         | Cerebrum and brain stem              | none                     | 17            |
| <i>Sarcocystis halioti</i>   | One Owl ( <i>Athene noctua</i> ), Michendorf, Gemany                                                                                           | Found dead                                                                     | Granulomatous encephalitis                                                                                                        | Cerebrum                             | none                     | 6             |

\* Experimental infection study: inoculated with  $10^2$  to  $10^4$  sporocysts, shed by an experimentally infected Northern goshawk (*A. g. gentilis*).

Abbreviations: Iba1, ionized calcium-binding adapter molecule 1; IHC, immunohistochemistry; MHC-II, major histocompatibility complex II; PAX5, paired box 5.

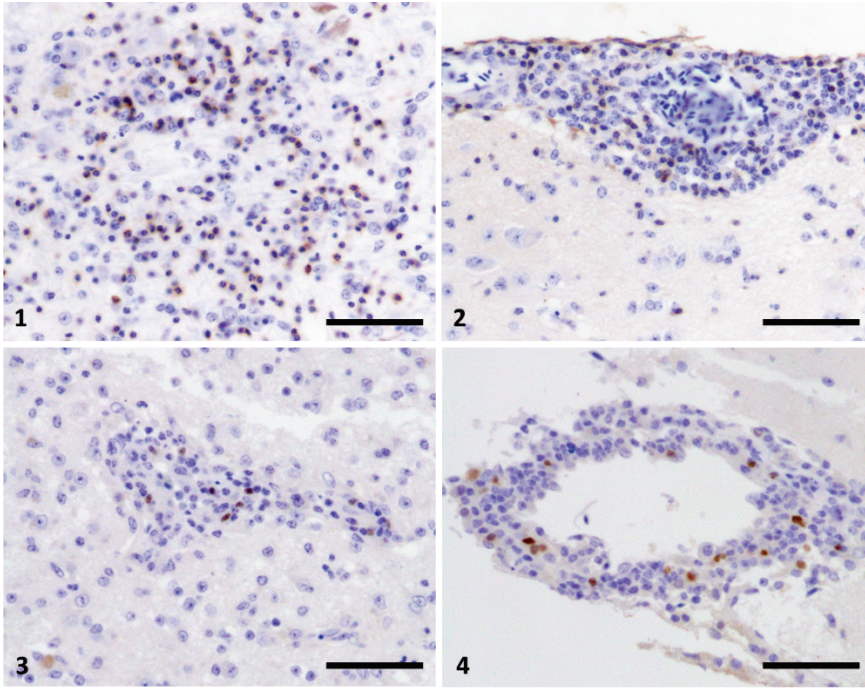

Supplementary Fig. 1. Infiltration of T lymphocytes into granulomatous lesions in the right cerebral hemisphere. CD3-positive T lymphocytes were observed in granulomatous lesions.

Immunohistochemistry for CD3, bar = 50  $\mu$ m.

Supplementary Fig. 2. Infiltration of T lymphocytes in the right cerebral hemisphere in patients with meningitis CD3-positive T lymphocytes were observed in subarachnoid spaces infiltrated by mononuclear cells. Immunohistochemistry for CD3, bar = 50  $\mu$ m.

Supplementary Fig. 3. Infiltration of B lymphocytes into granulomatous lesions in the right cerebral hemisphere. PAX5-positive B lymphocytes were scattered throughout the granulomatous lesions.

Immunohistochemistry for PAX5, bar = 50  $\mu$ m.

Supplementary Fig. 4. Infiltration of B lymphocytes in meningitis in the right cerebral hemisphere. PAX5-positive B lymphocytes were scattered in the subarachnoid spaces infiltrated by mononuclear cells. A leptomeningeal vessel was located in the subarachnoid space. Immunohistochemistry for PAX5, bar = 50  $\mu$ m.

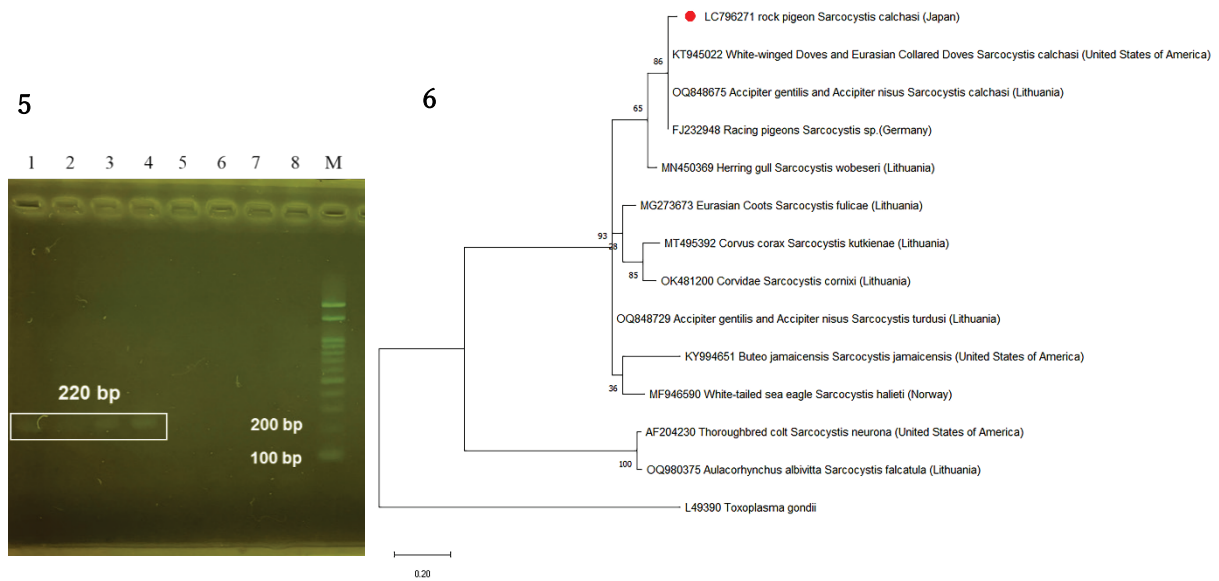

Supplementary Fig. 5. Agarose gel electrophoresis (2%) showed the expected size (220 bp) of the PCR products from DNA using the primer pair Scal1/Scal2/SNCa3 for ITS-1. Lane M, DNA ladder; Lane 1, heart; Lane 2, medulla oblongata; Lane 3, midbrain; Lane 4, cerebrum; Lane 5, kidney; Lane 6, lungs; Lane 7, liver; Lane 8, spleen. PCR, polymerase chain reaction; DNA, deoxyribonucleic acid. Supplementary Fig. 6. Phylogenetic analysis of ITS-1 was performed using the maximum likelihood method with 1,000 bootstrap replications. Values of < 50% are not shown. The nucleotide sequences of the 28S rRNA detected in this study were contained within *Sarcocystis calchasi* and formed a separate branch within a group encompassing *Sarcocystis spp.* obtained from birds as intermediate or definitive hosts. *Toxoplasma gondii* was included in the control group. Bootstrap values are shown in the interior branch nodes, and scale bars indicate the number of substitutions per site. Individual *Sarcocystis spp.* are named according to the accession number, definitive or intermediate host, and species of *Sarcocystis* (country). The red circle represents the *Sarcocystis spp.* identified as LC796271 in this study. rRNA, ribosomal ribonucleic acid.
